# Supplementary material for: Antioxidant activity of fraxetin and its regeneration in aqueous media. A density functional theory study
Source: Royal Society of Chemistry journal article supplement (doi:10.1039/c4ra08394f), 2014-01-01
Supplement: c4ra08394f1.pdf [file c4ra08394f1.pdf]

**Antioxidant activity of fraxetin and its regeneration in aqueous media. A density functional theory study**

Manuel E. Medina,<sup>a</sup> Cristina Iuga,<sup>b\*</sup> Juan Raúl Álvarez-Idaboy<sup>a\*</sup>

<sup>a</sup> *Departamento de Física y Química Teórica, Facultad de Química, Universidad Nacional Autónoma de México, México, D. F. 04510, México.*

<sup>b</sup> *Universidad Autónoma Metropolitana-Xochimilco, Calzada del Hueso 1100, 04960 México, D.F., México.*

Electronic supplementary information (ESI)

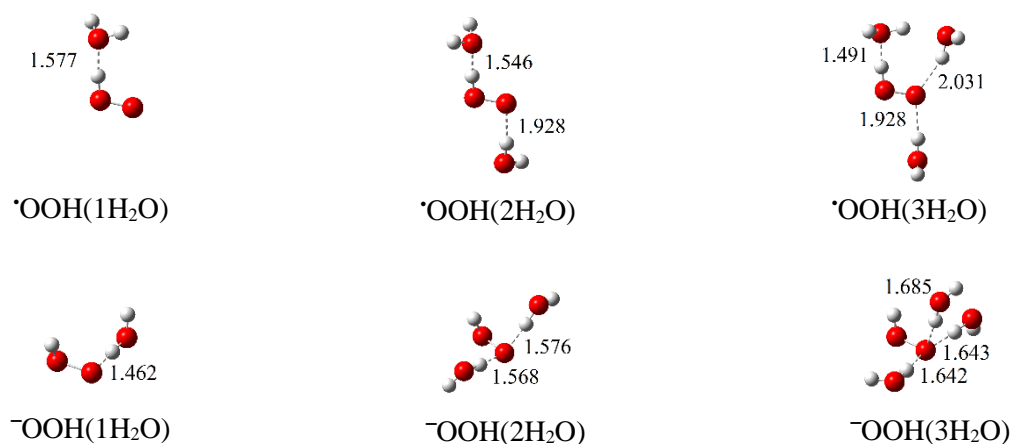

Figure A1. Geometries of complex between the  $\cdot\text{OOH}$  y  $^-\text{OOH}$  solvated with explicit water molecules.

| Transition states geometries calculated in lipid |   |             |             |             |
|--------------------------------------------------|---|-------------|-------------|-------------|
|                                                  | H | -3.24593681 | 0.01170280  | 1.91674607  |
|                                                  | C | -2.24672557 | -0.01790932 | -0.01668995 |
| TS-7(R=OOH)                                      | C | -3.41687124 | -0.09371512 | -0.79521201 |
| Freq= -2420.2275                                 | H | -4.37169280 | -0.12867167 | -0.29316420 |
| H= -912.862941                                   | C | -3.31564124 | -0.13615256 | -2.16647574 |
| G= -912.922750                                   | O | -4.35155040 | -0.26162107 | -3.02647826 |
| S2=0.773449                                      | C | -5.67603435 | -0.12658627 | -2.49110441 |
| S2A=0.75043                                      | H | -6.34250297 | -0.16628875 | -3.34619457 |
| 0 2                                              | H | -5.77720936 | 0.83191288  | -1.98366636 |
|                                                  | H | -5.89972204 | -0.94652766 | -1.80878624 |
|                                                  | C | -2.03347035 | -0.08146976 | -2.79035943 |
| O                                                | O | -1.87427598 | -0.01296454 | -4.09136186 |
| C                                                | H | -2.27117201 | -0.92980863 | -4.60507119 |
| O                                                | C | -0.86846155 | -0.03322219 | -1.99609630 |
| C                                                | O | 0.33075586  | 0.00933033  | -2.58200591 |
| H                                                | H | 0.18884541  | -0.00962382 | -3.54052274 |
| C                                                |   | -2.28407468 | 0.02917348  | 1.42132706  |

C -0.98771313 0.00481502 -0.61428301  
O -2.59448818 -2.10724629 -4.89539599  
O -2.96350384 -2.62583878 -3.69953725  
H -3.80190584 -2.17683522 -3.49195510

TS-7(R=OOCH3)

Freq= -2104.6514

H= -952.141623

G= -952.204550

S2=0.774125

S2A=0.750454

0 2

O -0.11628822 -0.44136985 -0.16056564  
C -0.09705431 -0.57711255 1.20253457  
O 0.96066588 -0.77170765 1.73915116  
C -1.38066821 -0.47251883 1.88702722  
H -1.35158663 -0.57806997 2.96093672  
C -2.52133217 -0.25763867 1.21051766  
H -3.46715547 -0.18072511 1.73100586  
C -2.50918709 -0.12292760 -0.22233325  
C -3.68455280 0.10455096 -0.96312110  
H -4.62292910 0.17787969 -0.43503165  
C -3.61233582 0.23103381 -2.33304686  
O -4.65402011 0.42697411 -3.15481125  
C -5.95132921 0.49409209 -2.55982654  
H -6.64616415 0.62923488 -3.38216327  
H -6.01587715 1.34369080 -1.87939202  
H -6.18005847 -0.43122066 -2.02914247  
C -2.34798165 0.13110163 -2.98845321  
O -2.21852890 0.28207462 -4.28708687  
H -2.45580648 -0.69891602 -4.78564186

C -1.17909677 -0.09818185 -2.23139413  
O 0.00014974 -0.19151929 -2.85089059  
H -0.15610465 -0.04263006 -3.79573105  
C -1.27063286 -0.22129896 -0.85207922  
O -2.67675948 -1.93084037 -4.99412222  
O -2.72304300 -2.39508993 -3.72795288  
C -4.06332813 -2.78748809 -3.39854546  
H -4.06278780 -2.96748829 -2.32639868  
H -4.74950425 -1.98979872 -3.67431882  
H -4.30348504 -3.70047727 -3.94151082

TS-8(OOH)

Freq= -2118.0127

H= -912.859672

G= -912.919426

S2=0.769852

S2A=0.750306

0 2

O -1.33114660 0.13160340 -0.63345646  
C -0.10075139 0.12466364 -0.00822486  
O -0.08490435 0.04532972 1.19020921  
C 1.06207944 0.21432394 -0.87533851  
H 2.02204890 0.20849747 -0.38247345  
C 0.93083825 0.29653696 -2.21069962  
H 1.80368055 0.36082683 -2.84811943  
C -0.37210591 0.30017826 -2.81913180  
C -0.56302102 0.38898234 -4.21787774  
H 0.30463211 0.45669711 -4.85775240  
C -1.83366117 0.39287958 -4.73872586  
O -2.17319290 0.48599110 -6.04901884  
C -1.10674580 0.55963239 -6.99950312

|   |             |             |             |
|---|-------------|-------------|-------------|
| H | -1.58077387 | 0.64801748  | -7.97129557 |
| H | -0.50449141 | -0.34830666 | -6.96145811 |
| H | -0.48974813 | 1.43768902  | -6.80789109 |
| C | -2.94476005 | 0.29845030  | -3.87911249 |
| O | -4.18833448 | 0.32794963  | -4.37996319 |
| H | -4.12640824 | 0.33970347  | -5.34652479 |
| C | -2.78893699 | 0.19743121  | -2.48199916 |
| O | -3.82111378 | 0.05321322  | -1.69536060 |
| H | -4.40100658 | 1.01376011  | -1.64937187 |
| C | -1.46284993 | 0.21753733  | -1.97494924 |
| O | -4.76884070 | 2.21233285  | -1.74271418 |
| O | -3.87894188 | 2.73206749  | -2.62639342 |
| H | -4.27165408 | 2.56094484  | -3.49779942 |

TS-8(R=OOCH3)

Freq= -2233.3438

H= -952.139593

G= -952.202836

S2=0.773517

S2A=0.75042

0 2

|   |             |            |             |
|---|-------------|------------|-------------|
| O | -1.48239407 | 0.18246503 | -0.69457167 |
| C | -0.27545369 | 0.29671286 | -0.03220667 |
| O | -0.29115747 | 0.24262142 | 1.16778362  |
| C | 0.90111626  | 0.46550809 | -0.86712366 |
| H | 1.84273869  | 0.55237144 | -0.34713008 |
| C | 0.80451594  | 0.50683411 | -2.20807517 |
| H | 1.68911449  | 0.63111444 | -2.81989828 |
| C | -0.47379295 | 0.38859646 | -2.85376874 |
| C | -0.63621800 | 0.43665368 | -4.25771620 |
| H | 0.24008804  | 0.55532995 | -4.87829036 |

|   |             |             |             |
|---|-------------|-------------|-------------|
| C | -1.89134024 | 0.33045298  | -4.80762829 |
| O | -2.19936493 | 0.36147131  | -6.13012541 |
| C | -1.12444494 | 0.54874217  | -7.05321591 |
| H | -1.57446692 | 0.53963952  | -8.04017788 |
| H | -0.40446120 | -0.26547034 | -6.96858780 |
| H | -0.63678155 | 1.50782034  | -6.87664203 |
| C | -3.01944782 | 0.17984035  | -3.97825489 |
| O | -4.23902840 | 0.09427371  | -4.51649711 |
| H | -4.14752625 | 0.14452803  | -5.47905526 |
| C | -2.89205883 | 0.11631581  | -2.57487386 |
| O | -3.93485982 | -0.05974957 | -1.81355668 |
| H | -4.13388793 | 0.93165974  | -1.26799884 |
| C | -1.57834540 | 0.22933868  | -2.03969935 |
| O | -4.19226417 | 2.13919620  | -1.02002804 |
| O | -3.35292052 | 2.65071931  | -1.95048220 |
| C | -4.11794123 | 3.18295033  | -3.03932646 |
| H | -4.71863317 | 4.01515715  | -2.67589349 |
| H | -4.75728887 | 2.40301551  | -3.45151612 |
| H | -3.38965105 | 3.52434328  | -3.77131319 |

Transition states geometries calculated in water

TS-7(R=OOH)

Freq=-2291.2069

H=-912.871365

G= -912.930959

S2=0.772087

S2A=0.75038

0 2

O 0.08059493 -0.11198473 -0.00043037  
 C 0.11504627 -0.11473779 1.36573815  
 O 1.20477775 -0.18699208 1.89287866  
 C -1.15285590 -0.02755837 2.06432003  
 H -1.10140997 -0.02258924 3.14232200  
 C -2.31527602 0.03889226 1.39144671  
 H -3.25786771 0.10098417 1.91872441  
 C -2.33285952 0.02863175 -0.04683965  
 C -3.52955204 0.08780089 -0.78042617  
 H -4.46529778 0.13482638 -0.24500263  
 C -3.47626122 0.08247257 -2.15750225  
 O -4.53832411 0.10500673 -2.98273496  
 C -5.83672300 0.02136462 -2.37595936  
 H -6.54251257 0.00074441 -3.19873684  
 H -6.01600209 0.89406953 -1.75011636  
 H -5.91354103 -0.89295432 -1.78861694  
 C -2.21548683 0.02304573 -2.82292688  
 O -2.12635514 0.07203020 -4.14341847  
 H -2.44874055 -0.88408862 -4.55416532  
 C -1.02606834 -0.05314396 -2.07634150  
 O 0.16778331 -0.12018235 -2.69112084  
 H 0.02261533 -0.09106270 -3.64910295  
 C -1.10112193 -0.04402414 -0.69305983  
 O -2.76747340 -2.16368563 -4.65581416  
 O -2.79304596 -2.53910365 -3.35923638  
 H -3.71563167 -2.42843247 -3.07061450

TS-7(R=OOCH<sub>3</sub>)

Freq= -2236.1250

H= -952.147664

G= -952.209857

S2=0.772473

S2A=0.750398

0 2

O -0.14708974 -0.48500165 -0.20747967  
 C -0.11138703 -0.60602057 1.15253522  
 O 0.96758466 -0.82165956 1.66333934  
 C -1.36598980 -0.46822962 1.86633512  
 H -1.31504662 -0.57144608 2.93946550  
 C -2.51688042 -0.22780185 1.21308814  
 H -3.44957350 -0.12673990 1.75187057  
 C -2.53338684 -0.09754467 -0.21930925  
 C -3.71699686 0.15589703 -0.93700167  
 H -4.64268164 0.25400111 -0.39119289  
 C -3.66585892 0.26969095 -2.30788274  
 O -4.72029826 0.49931326 -3.11077417  
 C -6.01732052 0.50346418 -2.49779723  
 H -6.72266692 0.64519522 -3.30918689  
 H -6.09610437 1.32502982 -1.78721479  
 H -6.19877607 -0.44996072 -2.00255792  
 C -2.42086229 0.12638943 -2.99045123  
 O -2.34058742 0.24404654 -4.30567237  
 H -2.29451256 -0.78002897 -4.73515054  
 C -1.24277485 -0.12300840 -2.25849794  
 O -0.06436869 -0.27656324 -2.88379687  
 H -0.18946595 -0.13119583 -3.83377803  
 C -1.31629981 -0.23203519 -0.87867146  
 O -2.31264676 -2.07175893 -4.84228183  
 O -2.61099747 -2.42920454 -3.57710532  
 C -4.01370389 -2.73424662 -3.46470274  
 O -0.14708974 -0.48500165 -0.20747967  
 C -0.11138703 -0.60602057 1.15253522  
 O 0.96758466 -0.82165956 1.66333934

TS-8(R=OOH)

Freq= -2313.5291

H= -912.869480

G= -912.929650

S2=0.768097

S2A=0.750246

0 2

|   |             |             |             |
|---|-------------|-------------|-------------|
| O | -1.41769273 | 0.12948348  | -0.67092646 |
| C | -0.19733342 | 0.18456401  | -0.03694616 |
| O | -0.20899162 | 0.11912554  | 1.17479010  |
| C | 0.97103645  | 0.31406446  | -0.87432946 |
| H | 1.92149678  | 0.35911299  | -0.36579299 |
| C | 0.85894161  | 0.36928035  | -2.21622539 |
| H | 1.73834943  | 0.46277755  | -2.83987072 |
| C | -0.42812516 | 0.30482029  | -2.84672530 |
| C | -0.60237706 | 0.36869665  | -4.25035645 |
| H | 0.27451911  | 0.46347163  | -4.87408649 |
| C | -1.86263629 | 0.31495274  | -4.79252250 |
| O | -2.17466537 | 0.37564469  | -6.11255081 |
| C | -1.08945436 | 0.55368490  | -7.03323740 |
| H | -1.54361608 | 0.60734303  | -8.01635776 |
| H | -0.40845150 | -0.29479810 | -6.97885900 |
| H | -0.56177498 | 1.48081122  | -6.81244219 |
| C | -2.98670402 | 0.19153189  | -3.94824215 |
| O | -4.22595815 | 0.15378574  | -4.44802504 |
| H | -4.18579425 | 0.22787165  | -5.41383515 |
| C | -2.84014469 | 0.11848527  | -2.54992111 |

O -3.89396325 -0.03156978 -1.76934913

H -4.33451899 0.96665926 -1.58808671

C -1.52958239 0.18704675 -2.02455339

O -4.55232960 2.23928722 -1.59468132

O -3.51907264 2.69422350 -2.34060787

H -3.87126684 2.79657609 -3.24120313

TS-8(OOCH<sub>3</sub>)

Freq= -2421.9348

H= -952.145822

G= -952.208584

S2=0.771176

S2A=0.750338

0 2

|   |             |             |             |
|---|-------------|-------------|-------------|
| O | -1.51016758 | 0.18536763  | -0.69659389 |
| C | -0.30681207 | 0.33878990  | -0.04504056 |
| O | -0.33625795 | 0.30378255  | 1.16749134  |
| C | 0.86447753  | 0.52078168  | -0.86784486 |
| H | 1.80264564  | 0.63482314  | -0.34739429 |
| C | 0.76940742  | 0.54735238  | -2.21232851 |
| H | 1.65060975  | 0.68626108  | -2.82484187 |
| C | -0.50189422 | 0.39598170  | -2.85856943 |
| C | -0.66658930 | 0.44261762  | -4.26325110 |
| H | 0.20890048  | 0.58404888  | -4.88012454 |
| C | -1.91824610 | 0.31403302  | -4.81665196 |
| O | -2.21806434 | 0.34730186  | -6.14109599 |
| C | -1.13527704 | 0.57952110  | -7.05240682 |
| H | -1.57801272 | 0.57625842  | -8.04211433 |
| H | -0.39709882 | -0.21730315 | -6.96950057 |
| H | -0.67712832 | 1.54658563  | -6.84804342 |

|   |             |             |             |
|---|-------------|-------------|-------------|
| C | -3.04305021 | 0.13713243  | -3.98666913 |
| O | -4.26945195 | 0.02424252  | -4.50604190 |
| H | -4.21603320 | 0.10246954  | -5.47115338 |
| C | -2.90931081 | 0.07867266  | -2.58539178 |
| O | -3.95867556 | -0.11171123 | -1.81475202 |
| H | -4.16837611 | 0.86448710  | -1.28915504 |
| C | -1.60382104 | 0.21510039  | -2.04963381 |
| O | -4.17886235 | 2.10251107  | -1.01342728 |
| O | -3.29084659 | 2.57467622  | -1.91894512 |
| C | -3.98680765 | 3.16021086  | -3.03297968 |
| H | -4.51323550 | 4.04669368  | -2.68478165 |
| H | -4.68349927 | 2.43117448  | -3.44305258 |
| H | -3.21467814 | 3.42058884  | -3.75157582 |

TS-8a(R=OOH)

Freq= -1877.6625

H= -912.415753

G= -912.476032

S2=0.762589

S2A=0.750124

-1 2

|   |             |             |             |
|---|-------------|-------------|-------------|
| O | 0.01685907  | -0.10751741 | -0.05370370 |
| C | 0.02841055  | -0.09885573 | 1.32040466  |
| O | 1.11667734  | -0.12127640 | 1.86002934  |
| C | -1.25075468 | -0.06492524 | 1.97758915  |
| H | -1.24083730 | -0.05595894 | 3.05587321  |
| C | -2.40116323 | -0.04838846 | 1.25558403  |
| H | -3.35717453 | -0.02772965 | 1.76392677  |
| C | -2.38382553 | -0.06093816 | -0.16295102 |
| C | -3.56146793 | -0.06282348 | -0.96304024 |
| H | -4.51380303 | -0.05198709 | -0.45379589 |

|   |             |             |             |
|---|-------------|-------------|-------------|
| C | -3.47935074 | -0.08089836 | -2.32548742 |
| O | -4.54186353 | -0.08302474 | -3.16996867 |
| C | -5.83429929 | -0.06118947 | -2.57729224 |
| H | -5.96864479 | 0.84169895  | -1.97946018 |
| H | -6.54222484 | -0.06553183 | -3.39923571 |
| H | -5.98820249 | -0.94293794 | -1.95333795 |
| C | -2.19122587 | -0.06405560 | -3.01001565 |
| O | -2.08498033 | -0.04115245 | -4.25561736 |
| C | -1.02239065 | -0.09279354 | -2.17110074 |
| O | 0.18746523  | -0.09332572 | -2.75945816 |
| H | 0.17260963  | -0.79509647 | -3.46637731 |
| C | -1.13811435 | -0.08689627 | -0.78463414 |
| O | -0.04557192 | -2.42172776 | -3.82434623 |
| O | -1.00339938 | -2.70293711 | -2.91694306 |
| H | -0.53839761 | -2.86663886 | -2.08235736 |

TS-8a(OOCH<sub>3</sub>)

Freq= -2334.6532

H= -951.697521

G= -951.760094

S2=0.763661

S2A=0.750156

-1 2

|   |             |            |             |
|---|-------------|------------|-------------|
| O | -0.01247666 | 0.08621677 | 0.08719168  |
| C | 0.00092244  | 0.11559849 | 1.45813003  |
| O | 1.08840556  | 0.11530689 | 1.99949806  |
| C | -1.27870407 | 0.14211419 | 2.11888217  |
| H | -1.26582616 | 0.16434232 | 3.19700590  |
| C | -2.42948783 | 0.13497070 | 1.40042477  |
| H | -3.38510764 | 0.14839019 | 1.90964821  |
| C | -2.41322492 | 0.10636131 | -0.02001227 |

|   |             |             |             |
|---|-------------|-------------|-------------|
| C | -3.59266763 | 0.07213208  | -0.81394190 |
| H | -4.54406056 | 0.06565259  | -0.30305743 |
| C | -3.50944278 | 0.04337059  | -2.17706078 |
| O | -4.57073905 | -0.00619903 | -3.02065864 |
| C | -5.86291137 | -0.04007180 | -2.42706445 |
| H | -6.57001523 | -0.08918336 | -3.24824300 |
| H | -6.04133646 | 0.86220930  | -1.84023254 |
| H | -5.97224781 | -0.92089344 | -1.79240563 |
| C | -2.22299451 | 0.08733804  | -2.86094544 |
| O | -2.12819895 | 0.09911260  | -4.11174352 |
| C | -1.05059403 | 0.06745961  | -2.03064862 |
| O | 0.15472831  | 0.04036375  | -2.62073398 |
| H | 0.15520864  | -0.75836486 | -3.24464934 |
| C | -1.16900710 | 0.08921815  | -0.64366047 |
| O | -0.12332898 | -2.22878293 | -3.72484528 |
| O | -1.02452474 | -2.55926741 | -2.78158776 |
| C | -2.23963689 | -2.99489399 | -3.39796745 |
| H | -2.93205826 | -3.18979574 | -2.58319871 |
| H | -2.60258489 | -2.20013187 | -4.04835329 |
| H | -2.03845257 | -3.90254664 | -3.96442560 |
